# Supplementary material
Source: PubMed Central journal article supplement (PMC3023481)
Supplement: supp_M110.193797_jbc.M110.193797-1.pdf [file supp_M110.193797_jbc.M110.193797-1.pdf]

## SUPPLEMENTAL FIGURE LEGENDS

**Supplemental Figure 1. Integrin  $\alpha$ IIB TM domain does not form homo-oligomers before and after soluble ligand binding.** Samples were processed as in Fig.1 and subjected to non-reducing 7.5 % SDS-PAGE and fluorography. In addition to Figure 1, none of the other cysteine mutants of the  $\alpha$ IIB TM regions formed homomeric disulfide bonds before or after soluble ligand binding.

**Supplemental Figure 2. Integrin  $\beta$ 3 TM domain does not form homo-oligomers before and after soluble ligand binding.** Samples were processed as in Fig.1 and subjected to non-reducing 7.5 % SDS-PAGE and fluorography. In addition to Figure 1, none of the other cysteine mutants of the  $\beta$ 3 TM regions formed homomeric disulfide bonds before or after soluble ligand binding.

**Supplemental Figure 3. Integrin TM domains do not form homo-oligomers during inside-out activation.** Samples were processed as in Fig.1 and subjected to non-reducing 7.5 % SDS-PAGE and fluorography. In addition to Figure 3, none of the other cysteine mutations of  $\beta$ 3 TM regions formed homomeric disulfide bonds when they were co-transfected with the  $\alpha$ IIB GAAKR mutant.

**Supplemental Figure 4. Integrin TM domains do not form homo-oligomers after binding to the immobilized fibrinogen.** Samples were processed as in Fig.1 and subjected to non-reducing 7.5 % SDS-PAGE and fluorography. In addition to Figure 6, none of the other  $\alpha$ IIB or  $\beta$ 3 cysteine mutants formed a homomeric disulfide bond after adhering to the immobilized fibrinogen

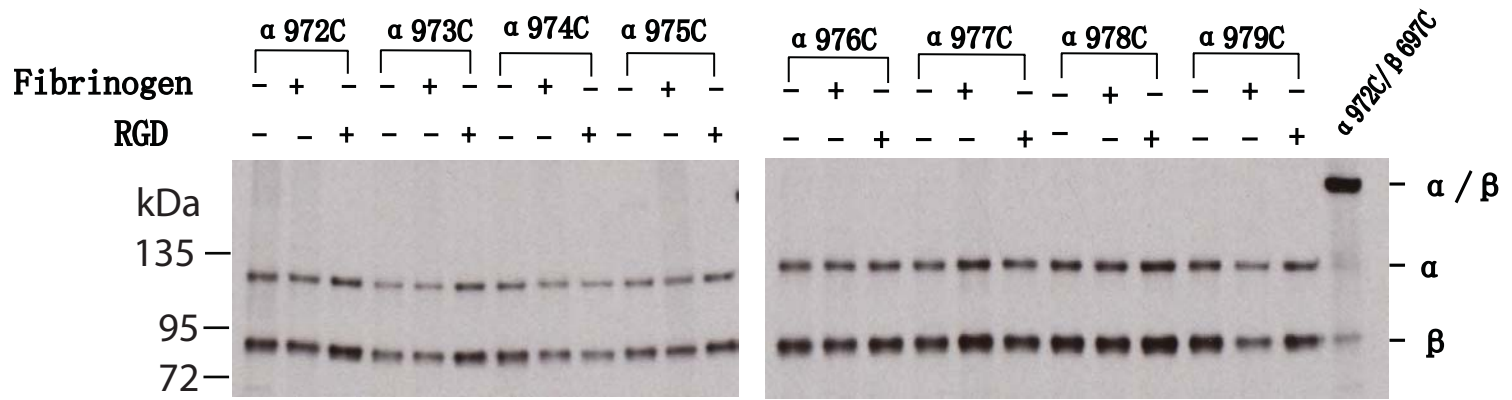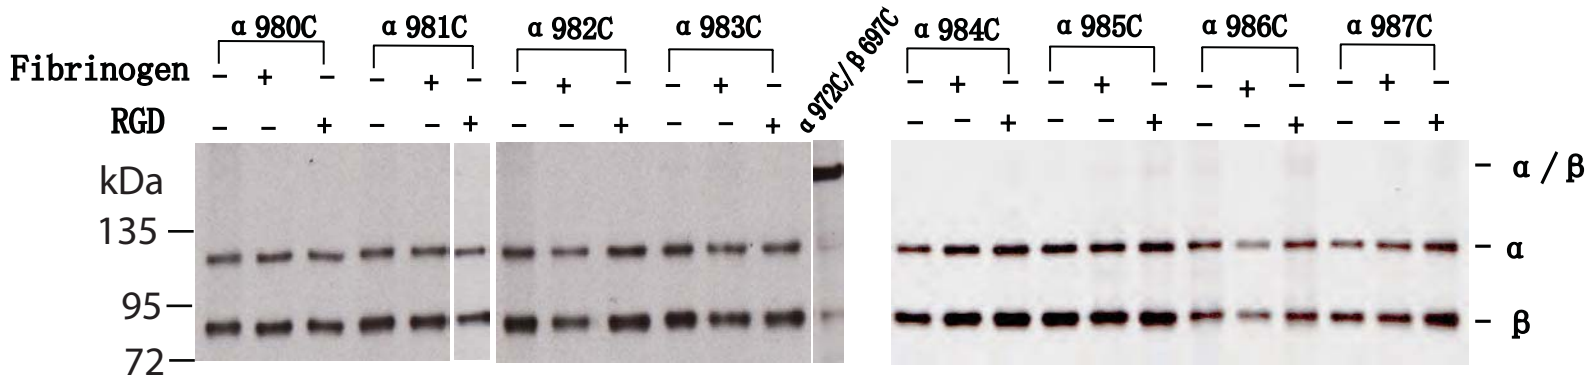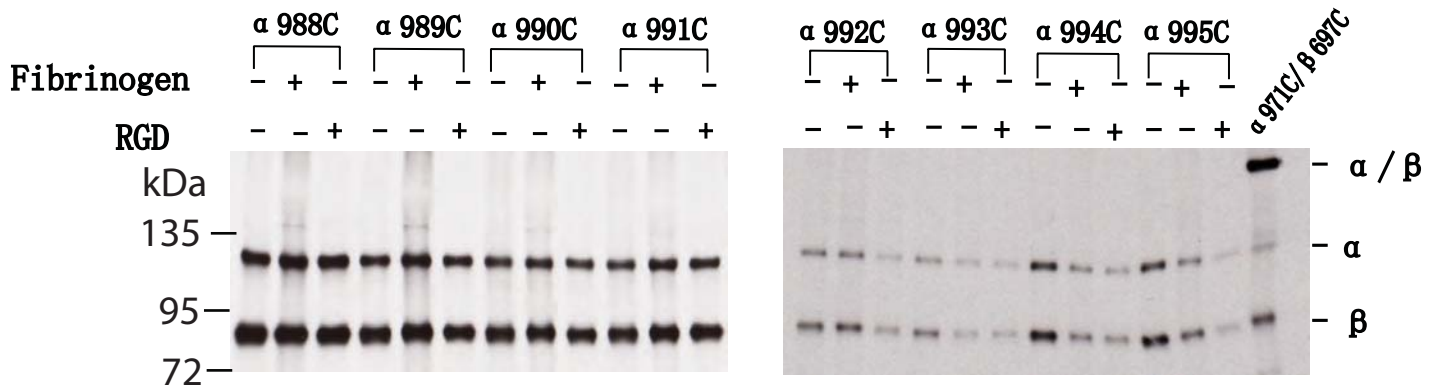

Supplemental Figure 1

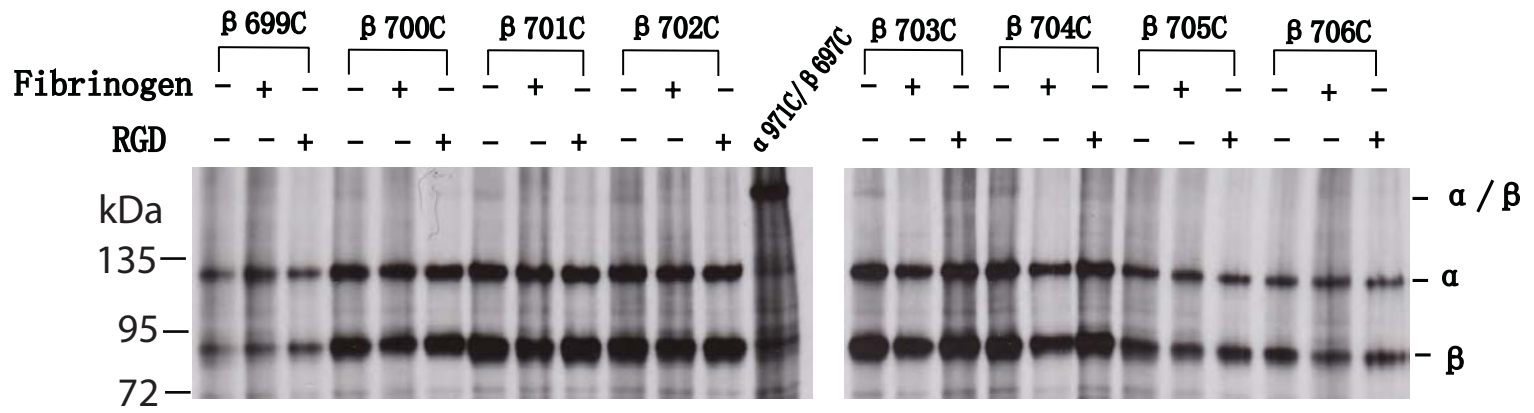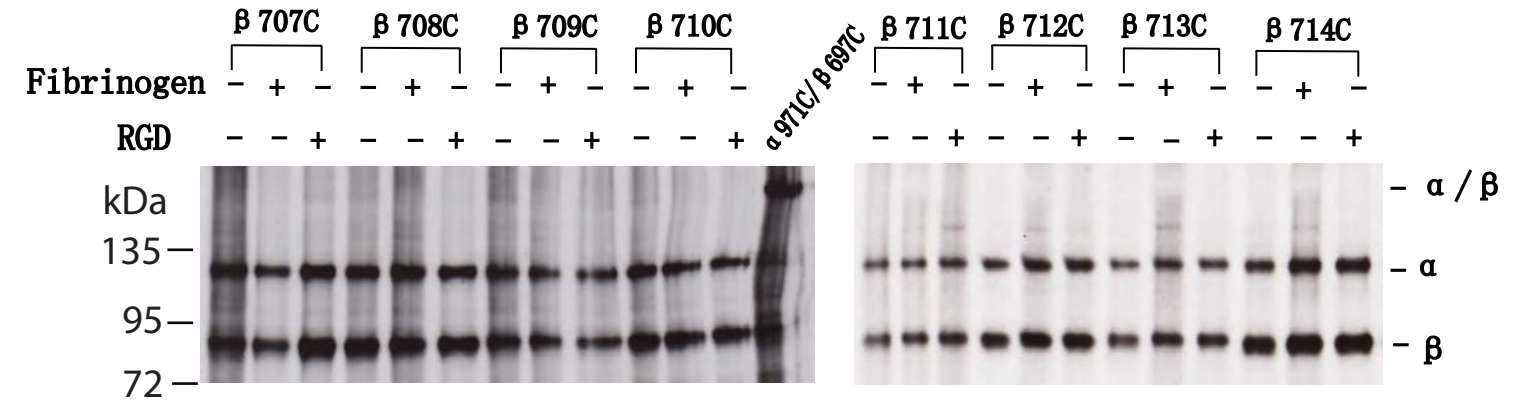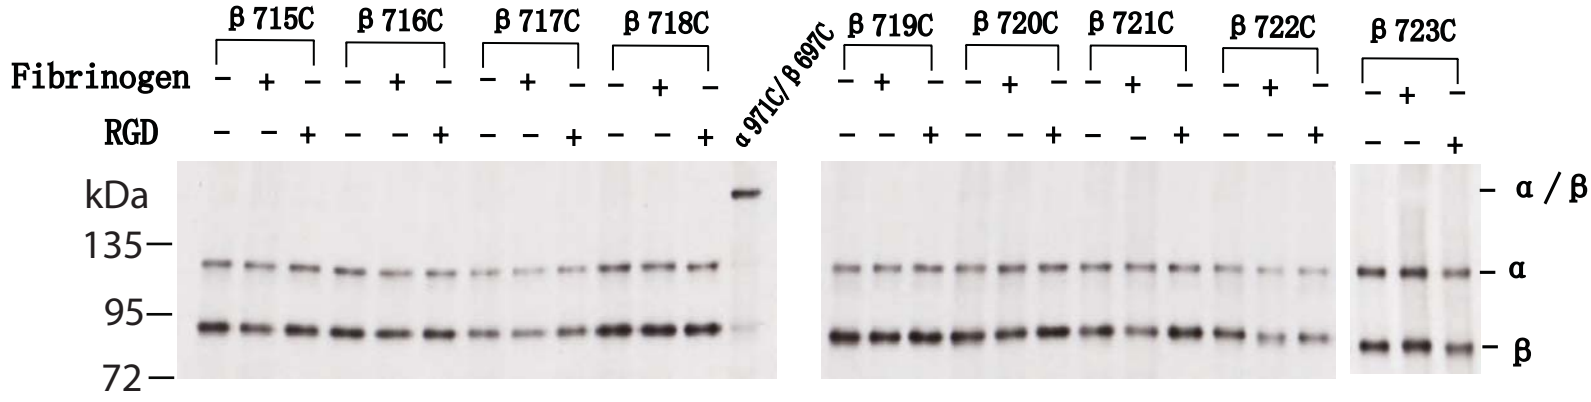

Supplemental Figure 2

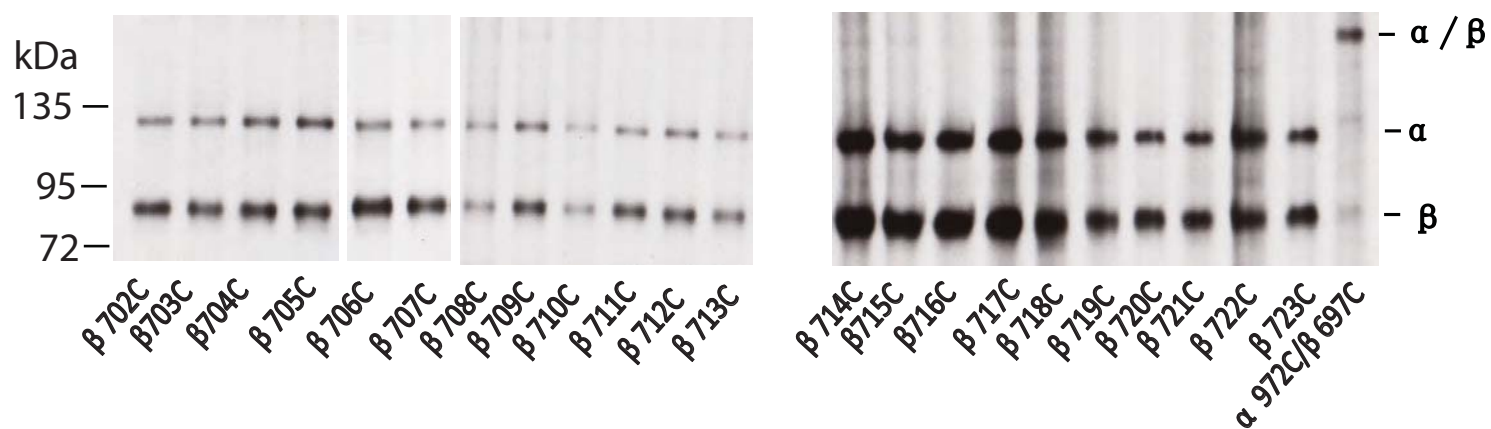

Supplemental Figure 3

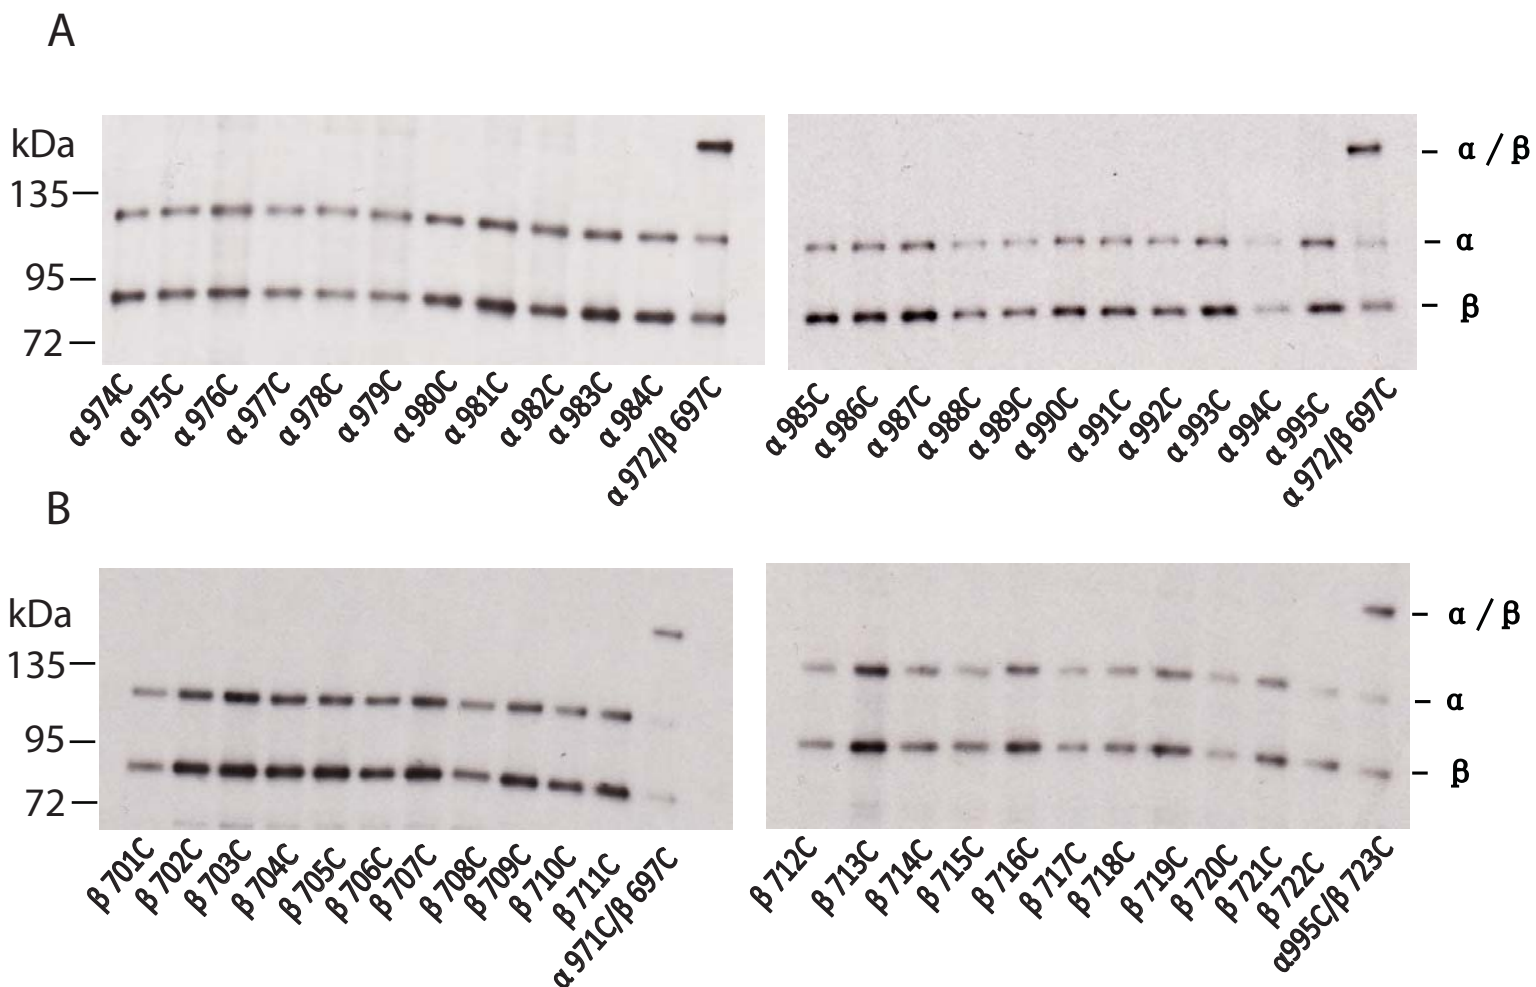

Supplemental Figure 4
